# Supplementary material for: Improving Fusarium Basal Rot Resistance of Onion Cultivars through Artificial Inoculation and Selection of Mature Bulbs
Source: MDPI journal article supplement (doi:10.3390/horticulturae7070168), 2021-06-29
Supplement: s1 [file s1]

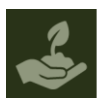

**Supplementary Table S1.** Fixed effect ANOVA of FBR severity and incidence of early maturing cultivars comprising the original, intermediate, and advanced selected populations evaluated for four seasons.

| Source <sup>w</sup>                               | df             | NuMex Camino      |                   | df | NuMex Sweetpak    |                   |
|---------------------------------------------------|----------------|-------------------|-------------------|----|-------------------|-------------------|
|                                                   |                | Sev. <sup>y</sup> | Inc. <sup>z</sup> |    | Sev. <sup>y</sup> | Inc. <sup>z</sup> |
|                                                   |                | P-value           | P-value           |    | P-value           | P-value           |
| <i>Intermediate selections with their parents</i> |                |                   |                   |    |                   |                   |
| Year                                              | 3              | 0.01*             | 0.01**            | 3  | 0.03*             | 0.03*             |
| Populations                                       | 2              | 0.57              | 0.56              | 2  | 0.69              | 0.54              |
| Year x Popl.                                      | 5 <sup>x</sup> | 0.07              | 0.03*             | 6  | 0.01*             | 0.009**           |
| <i>Advanced selections with their parents</i>     |                |                   |                   |    |                   |                   |
| Year                                              | 1              | 0.22              | 0.30              | 1  | 0.72              | 0.66              |
| Populations                                       | 2              | 0.92              | 0.89              | 2  | 0.02*             | 0.03*             |
| Year x Popl.                                      | 2              | 0.69              | 0.54              | 2  | 0.65              | 0.49              |

<sup>w</sup>Entries were evaluated in a randomized complete block design with four replications from 2016 to 2019 summer seasons.

<sup>x</sup>The parental population of 'NuMex Camino' did not produce any bulbs in 2017 evaluation.

<sup>y</sup>Severity of FBR. After 20 days of disease development period twenty arbitrarily selected, inoculated bulbs were rated individually for FBR severity on a scale of 1 to 9, where 1= no symptoms, 2<10% basal plate decay, 3=11%-20%, 4=21%-30%, 5=31%-40%, 6=41%-50%, 7=51%- 60%, 8=61%-70%, and 9>70% of the basal plate is infected.

<sup>z</sup>Incidence of FBR, which is the percentage of 20 inoculated bulbs showing FBR symptoms, was calculated after 20 d of incubation.

\*,\*\*Significantly different at  $P < 0.05$  and  $0.01$ , respectively.

**Supplementary Table S2.** Fixed effect ANOVA of FBR severity and incidence of intermediate maturing cultivars comprising the original, intermediate, and advanced selected populations evaluated for four seasons.

| Source <sup>w</sup>                               | df | NuMex Chaco       |                   | df | NuMex Mesa        |                   | df | NuMex Crispy      |                   |
|---------------------------------------------------|----|-------------------|-------------------|----|-------------------|-------------------|----|-------------------|-------------------|
|                                                   |    | Sev. <sup>y</sup> | Inc. <sup>z</sup> |    | Sev. <sup>y</sup> | Inc. <sup>z</sup> |    | Sev. <sup>y</sup> | Inc. <sup>z</sup> |
|                                                   |    | P-value           | P-value           |    | P-value           | P-value           |    | P-value           | P-value           |
| <i>Intermediate selections with their parents</i> |    |                   |                   |    |                   |                   |    |                   |                   |
| Year                                              | 3  | 0.004**           | 0.01*             | 3  | 0.03*             | 0.13              | 3  | 0.0004***         | 0.001**           |
| Popln.                                            | 2  | 0.08              | 0.09              | 2  | 0.06              | 0.03*             | 2  | 0.02*             | 0.03*             |
| Year x Popln.                                     | 6  | 0.07              | 0.08              | 5  | 0.02*             | 0.004**           | 6  | 0.27              | 0.05              |
| <i>Advanced selections with their parents</i>     |    |                   |                   |    |                   |                   |    |                   |                   |
| Year                                              | 1  | 0.22              | 0.16              | 1  | 0.01*             | 0.04              | 1  | 0.03*             | 0.03*             |
| Popln.                                            | 2  | 0.01*             | 0.006**           | 2  | 0.64              | 0.48              | 2  | 0.02*             | 0.03*             |
| Year x Popln.                                     | 2  | 0.15              | 0.04*             | 2  | 0.04*             | 0.08              | 2  | 0.71              | 0.54              |

<sup>w</sup>Entries were evaluated in a randomized complete block design with four replications from 2016 to 2019 summer seasons.

<sup>y</sup>Severity of FBR. After 20 days of disease development period twenty arbitrarily selected, inoculated bulbs were rated individually for FBR severity on a scale of 1 to 9, where 1= no symptoms, 2<10% basal plate decay, 3=11%-20%, 4=21%-30%, 5=31%-40%, 6=41%-50%, 7=51%- 60%, 8=61%-70%, and 9>70% of the basal plate is infected.

<sup>z</sup>Incidence of FBR, which is the percentage of 20 inoculated bulbs showing FBR symptoms, was calculated after 20 d of incubation.

\*, \*\*, \*\*\*Significantly different at  $P < 0.05$ ,  $0.01$ , and  $0.001$ , respectively.

**Supplementary Table S3.** Fixed effect ANOVA of FBR severity and incidence of late maturing cultivars comprising the original, intermediate, and advanced selected populations evaluated for four seasons.

| Populations evaluated for four seasons.           |    |                   |                   |    |                   |                   |
|---------------------------------------------------|----|-------------------|-------------------|----|-------------------|-------------------|
| Source <sup>w</sup>                               | df | NuMex Vado        |                   | df | NuMex Luna        |                   |
|                                                   |    | Sev. <sup>y</sup> | Inc. <sup>z</sup> |    | Sev. <sup>y</sup> | Inc. <sup>z</sup> |
|                                                   |    | P-value           | P-value           |    | P-value           | P-value           |
| <i>Intermediate selections with their parents</i> |    |                   |                   |    |                   |                   |
| Year                                              | 3  | 0.01*             | 0.09              | 3  | 0.40              | 0.65              |
| Populations                                       | 2  | 0.02*             | 0.01*             | 2  | 0.04**            | 0.07              |
| Year x Popl.                                      | 6  | 0.0007***         | 0.05              | 6  | 0.07              | 0.28              |
| <i>Advanced selections with their parents</i>     |    |                   |                   |    |                   |                   |
| Year                                              | 1  | 0.34              | 0.63              | 1  | 0.68              | 0.53              |
| Populations                                       | 2  | 0.0003***         | 0.0002***         | 2  | 0.02*             | 0.17              |
| Year x Popl.                                      | 2  | 0.02*             | 0.008**           | 2  | 0.02*             | 0.01*             |

<sup>w</sup>were evaluated in a randomized complete block design with four replications from 2016 to 2019 summer seasons.

<sup>y</sup>Severity of FBR. After 20 days of disease development period twenty arbitrarily selected, inoculated bulbs were rated individually for FBR severity on a scale of 1 to 9, where 1= no symptoms, 2<10% basal plate decay, 3=11%-20%, 4=21%-30%, 5=31%-40%, 6=41%-50%, 7=51%- 60%, 8=61%-70%, and 9>70% of the basal plate is infected.

<sup>z</sup>Incidence of FBR, which is the percentage of 20 inoculated bulbs showing FBR symptoms, was calculated after 20 d of incubation.

\*, \*\*, \*\*\*Significantly different at  $P < 0.05$ ,  $0.01$ , and  $0.001$ , respectively.

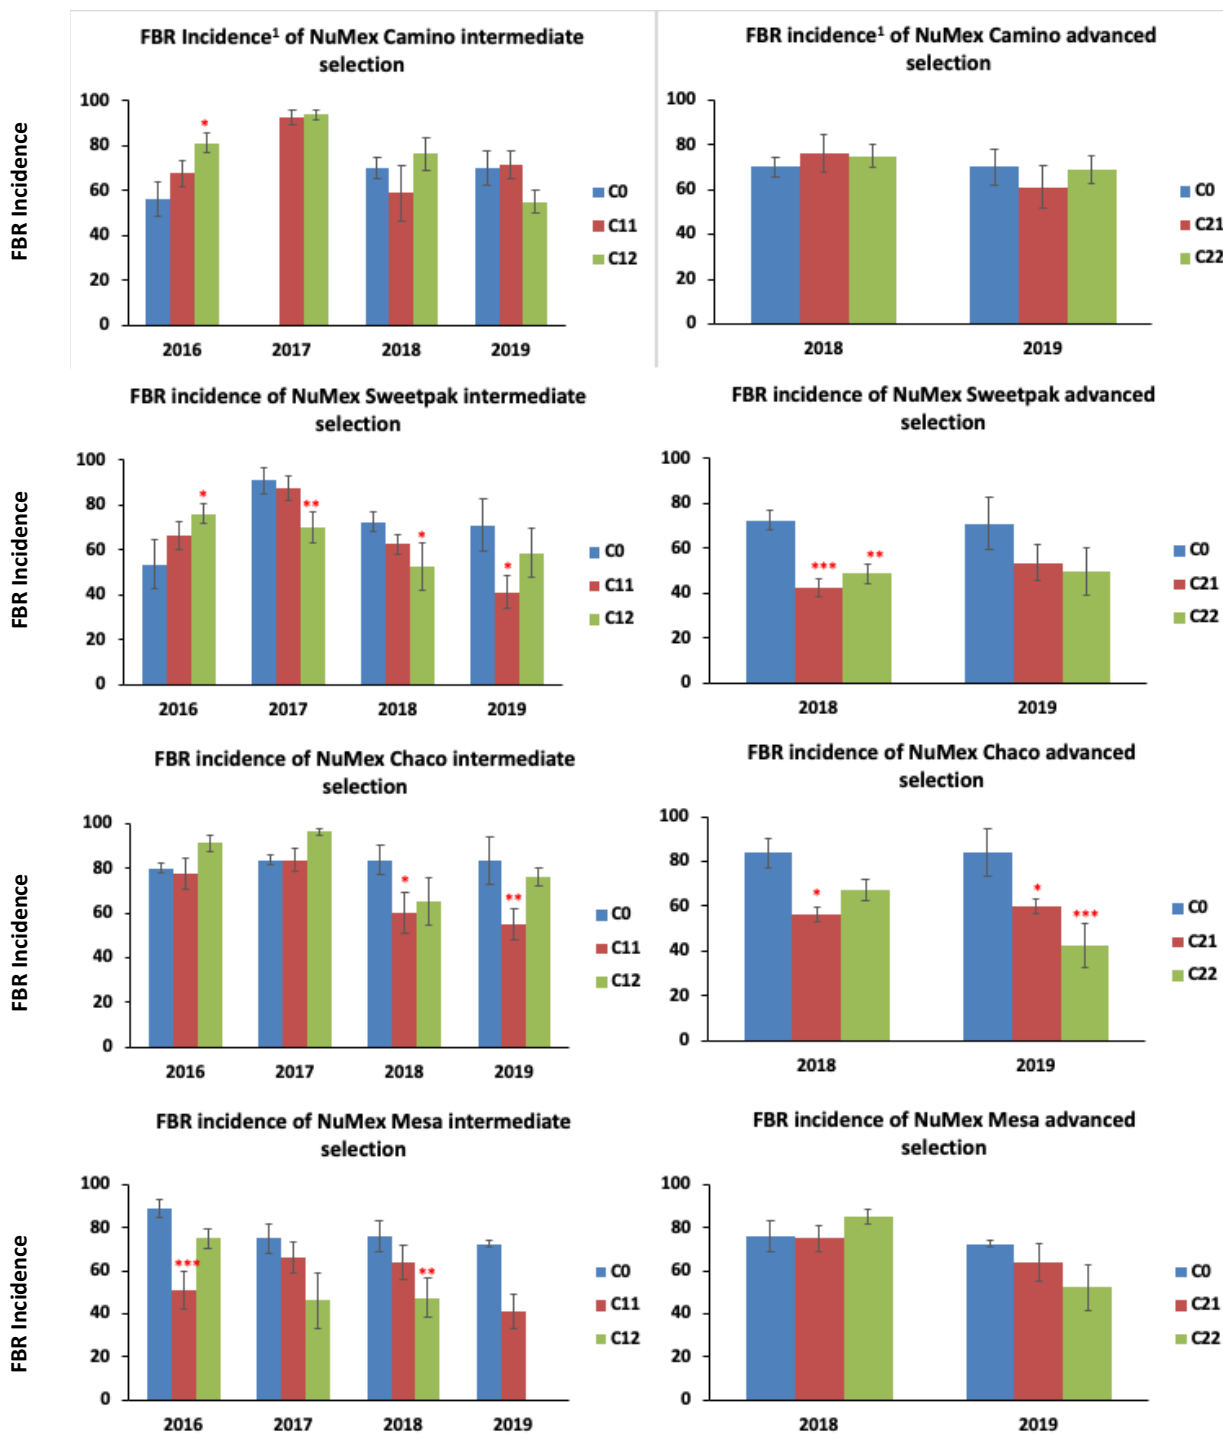

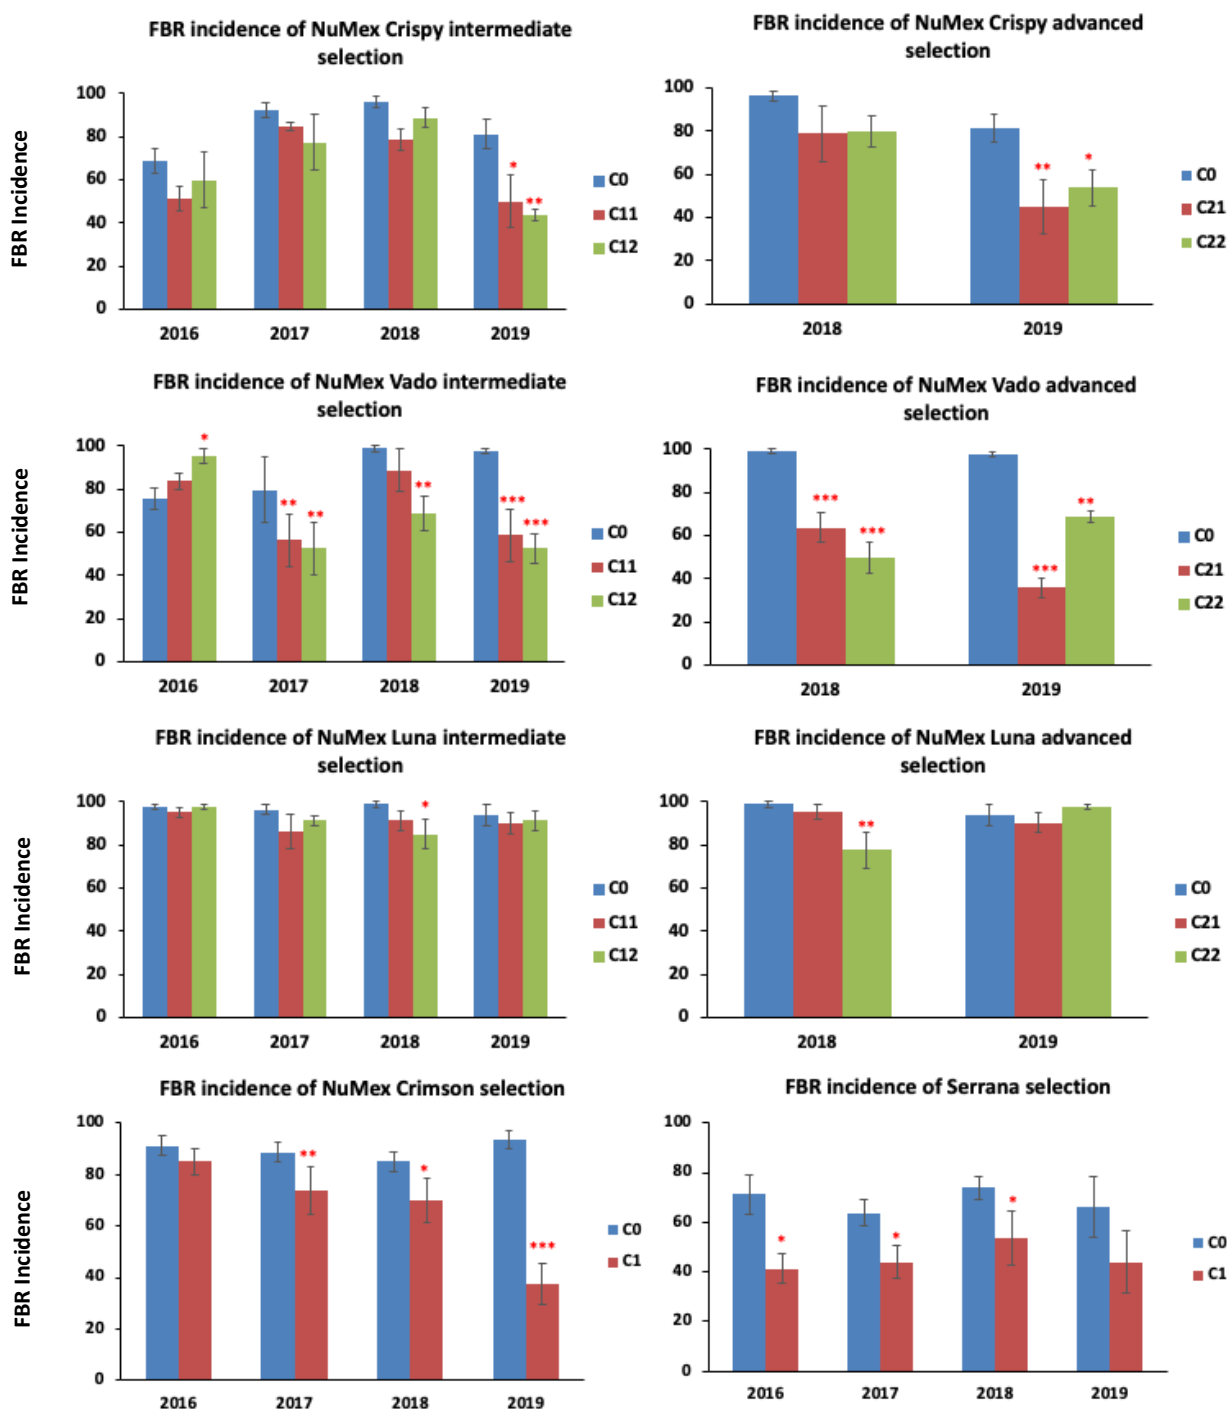

**Supplementary Figure S1.** FBR incidence of the seven cultivars and two checks, comprising the parental or C0 populations with their first cycle of selected populations, C1, C11 and C12, and second cycle of selected populations, C21 and C22, evaluated for four and two seasons, respectively. <sup>1</sup>FBR incidence, which is the percentage of 20 inoculated bulbs showing FBR symptoms, was calculated after 20 d of incubation. \*, \*\*, \*\*\*Significantly different from C0 at  $P < 0.05$ , 0.01, and 0.001, respectively, in each year.
